# Supplementary material
Source: publisher figshare collection journal article supplement (https://diabetesjournals.figshare.com/articles/dataset/_/21445284)
Supplement: Supplementary file 1 [file 38063811]

## **Supplemental Material**

**Supplementary Table 1. Descriptions of Databases.**

**Supplementary Table 2. Full characteristics for SGLT2 inhibitors vs. DPP4 inhibitors.**

**Supplementary Table 3. Covariate Definition.**

**Supplementary Table 4. Breakdowns of baseline exposures.**

**Supplementary Table 5. Summary of Study End Points.**

**Supplementary Table 1. Descriptions of Databases.**

| <b>Database</b>                                                 | <b>Description</b>                                                                                                                                               |
|-----------------------------------------------------------------|------------------------------------------------------------------------------------------------------------------------------------------------------------------|
| Ontario Drug Benefit (ODB) database                             | This database contains records of all dispensed outpatient prescriptions covered by Ontario Drug Benefit in individuals mainly aged 65 years or older.           |
| Ontario Diabetes Database (ODD)                                 | This database contains individuals with diabetes identified by a validated algorithm and ascertains information on the age of diabetes diagnosis when available. |
| Continuing Care Reporting System (CCRS)                         | This database ascertains information on long-term care admission                                                                                                 |
| Registered Persons Database (RPDB)                              | This database ascertains information on demographic characteristics and vital status                                                                             |
| Ontario Health Insurance Plan (OHIP) physician billing database | This database ascertains records on physician claims and billings                                                                                                |
| National Ambulatory Care Reporting System (NACRS)               | This database ascertains records on emergency visits.                                                                                                            |
| Discharge Abstract Database (DAD)                               | This database ascertains records on hospitalizations.                                                                                                            |
| ICES Physician Database (IPDB)                                  | This database ascertains information on prescribing physicians                                                                                                   |

**Supplementary Table 2. Full characteristics for SGLT2 inhibitors vs. DPP4 inhibitors.**

| Variables                               | Before Weighting              |                              |        | After Weighting               |                              |        |
|-----------------------------------------|-------------------------------|------------------------------|--------|-------------------------------|------------------------------|--------|
|                                         | SGLT2 Inhibitors<br>(n=36513) | DPP4 Inhibitors<br>(n=70390) | SMD    | SGLT2 Inhibitors<br>(n=36513) | DPP4 Inhibitors<br>(n=36545) | SMD    |
| Age                                     | 72.4 (5.38)                   | 74.26 (6.54)                 | -0.311 | 72.4 (5.38)                   | 72.41 (3.89)                 | -0.002 |
| 66-69                                   | 36.92% (13482)                | 29.02% (20426)               | 0.169  | 36.92% (13482)                | 37.5% (13705)                | -0.012 |
| 70-74                                   | 33.13% (12097)                | 29.27% (20604)               | 0.083  | 33.13% (12097)                | 33.03% (12073)               | 0.002  |
| 75-79                                   | 18.38% (6711)                 | 20.14% (14174)               | -0.045 | 18.38% (6711)                 | 18.05% (6596)                | 0.008  |
| 80-84                                   | 8.34% (3045)                  | 12.94% (9110)                | -0.150 | 8.34% (3045)                  | 8.21% (2999)                 | 0.004  |
| 85-89                                   | 2.69% (981)                   | 6.28% (4419)                 | -0.174 | 2.69% (981)                   | 2.69% (982)                  | 0.000  |
| 90+                                     | 0.54% (197)                   | 2.35% (1657)                 | -0.152 | 0.54% (197)                   | 0.52% (190)                  | 0.002  |
| Male                                    | 61.21% (22349)                | 52.95% (37270)               | 0.167  | 61.21% (22349)                | 61.04% (22308)               | 0.003  |
| Rural                                   | 15.27% (5575)                 | 11.2% (7883)                 | 0.120  | 15.27% (5575)                 | 15.53% (5677)                | -0.008 |
| Diabetes Duration, Years                | 12.03 (7.71)                  | 11.19 (7.48)                 | 0.111  | 12.03 (7.71)                  | 12.03 (5.62)                 | 0.000  |
| Index Date Year                         |                               |                              |        |                               |                              |        |
| 2016                                    | 10.42% (3803)                 | 15.11% (10634)               | -0.141 | 10.42% (3803)                 | 10.41% (3804)                | 0.000  |
| 2017                                    | 24.01% (8768)                 | 30.33% (21351)               | -0.142 | 24.01% (8768)                 | 23.61% (8629)                | 0.009  |
| 2018                                    | 24.85% (9075)                 | 27.58% (19411)               | -0.062 | 24.85% (9075)                 | 24.69% (9022)                | 0.004  |
| 2019                                    | 31.65% (11558)                | 22.8% (16049)                | 0.200  | 31.65% (11558)                | 32.1% (11732)                | -0.010 |
| 2020                                    | 9.06% (3309)                  | 4.18% (2945)                 | 0.197  | 9.06% (3309)                  | 9.19% (3358)                 | -0.005 |
| Neighbourhood Income Quintiles          |                               |                              |        |                               |                              |        |
| 1                                       | 20.93% (7643)                 | 23.45% (16503)               | -0.061 | 20.93% (7643)                 | 21.03% (7685)                | -0.002 |
| 2                                       | 21.8% (7959)                  | 22.44% (15792)               | -0.015 | 21.8% (7959)                  | 21.93% (8016)                | -0.003 |
| 3                                       | 20.6% (7520)                  | 20.4% (14359)                | 0.005  | 20.6% (7520)                  | 20.62% (7534)                | -0.001 |
| 4                                       | 18.94% (6917)                 | 17.79% (12520)               | 0.030  | 18.94% (6917)                 | 18.93% (6918)                | 0.000  |
| 5                                       | 17.73% (6474)                 | 15.93% (11216)               | 0.048  | 17.73% (6474)                 | 17.49% (6392)                | 0.006  |
| Neighbourhood Education Quintiles       |                               |                              |        |                               |                              |        |
| 1                                       | 19.06% (6959)                 | 20.36% (14334)               | -0.033 | 19.06% (6959)                 | 19.53% (7136)                | -0.012 |
| 2                                       | 21.23% (7752)                 | 21.24% (14949)               | 0.000  | 21.23% (7752)                 | 20.97% (7662)                | 0.006  |
| 3                                       | 19.78% (7222)                 | 18.56% (13067)               | 0.031  | 19.78% (7222)                 | 19.86% (7258)                | -0.002 |
| 4                                       | 20.61% (7526)                 | 19.94% (14034)               | 0.017  | 20.61% (7526)                 | 20.25% (7399)                | 0.009  |
| 5                                       | 19.32% (7054)                 | 19.9% (14006)                | -0.015 | 19.32% (7054)                 | 19.4% (7091)                 | -0.002 |
| Prescribing Physician Specialty         |                               |                              |        |                               |                              |        |
| Cardiology                              | 5.38% (1965)                  | 0.42% (295)                  | 0.299  | 5.38% (1965)                  | 5.29% (1934)                 | 0.005  |
| Endocrinology                           | 12.34% (4505)                 | 8.17% (5748)                 | 0.138  | 12.34% (4505)                 | 11.99% (4380)                | 0.012  |
| General practitioner / Family physician | 65.93% (24072)                | 76.45% (53813)               | -0.234 | 65.93% (24072)                | 66.56% (24323)               | -0.014 |

|                                       |                |                |        |                |                |        |
|---------------------------------------|----------------|----------------|--------|----------------|----------------|--------|
| Internal Medicine                     | 6.51% (2378)   | 4.6% (3237)    | 0.084  | 6.51% (2378)   | 6.31% (2305)   | 0.009  |
| Nephrology                            | 2.54% (926)    | 1.86% (1311)   | 0.046  | 2.54% (926)    | 2.46% (900)    | 0.005  |
| Others                                | 1.86% (678)    | 2.36% (1659)   | -0.035 | 1.86% (678)    | 1.88% (687)    | -0.002 |
| Missing                               | 5.45% (1989)   | 6.15% (4327)   | -0.030 | 5.45% (1989)   | 5.52% (2016)   | -0.003 |
| Charlson Comorbidity Index            |                |                |        |                |                |        |
| 0                                     | 82.58% (30154) | 81.14% (57116) | 0.037  | 82.58% (30154) | 82.62% (30194) | -0.001 |
| 1                                     | 4.81% (1756)   | 5.31% (3741)   | -0.023 | 4.81% (1756)   | 4.77% (1743)   | 0.002  |
| 2                                     | 5.35% (1955)   | 5.38% (3785)   | -0.001 | 5.35% (1955)   | 5.27% (1927)   | 0.004  |
| 3+                                    | 7.25% (2648)   | 8.17% (5748)   | -0.034 | 7.25% (2648)   | 7.33% (2680)   | -0.003 |
| Polypharmacy                          |                |                |        |                |                |        |
| 0                                     | 2.2% (805)     | 4.72% (3322)   | -0.138 | 2.2% (805)     | 2.35% (857)    | -0.008 |
| 1-5                                   | 28.67% (10469) | 31.7% (22313)  | -0.066 | 28.67% (10469) | 29.04% (10613) | -0.008 |
| 6-10                                  | 45.31% (16544) | 41.11% (28937) | 0.085  | 45.31% (16544) | 45.01% (16450) | 0.006  |
| 10+                                   | 23.81% (8695)  | 22.47% (15818) | 0.032  | 23.81% (8695)  | 23.6% (8625)   | 0.005  |
| Comorbidities                         |                |                |        |                |                |        |
| Chronic kidney disease                | 10.61% (3873)  | 15.49% (10901) | -0.145 | 10.61% (3873)  | 10.58% (3865)  | 0.001  |
| Acute kidney injury                   | 3.52% (1284)   | 5.92% (4170)   | -0.114 | 3.52% (1284)   | 3.53% (1288)   | 0.000  |
| Acute urinary retention               | 1.56% (570)    | 2.25% (1585)   | -0.051 | 1.56% (570)    | 1.57% (574)    | -0.001 |
| Chronic lung disease                  | 22.65% (8271)  | 21.96% (15457) | 0.017  | 22.65% (8271)  | 22.85% (8351)  | -0.005 |
| Cancer                                | 32.09% (11716) | 32.64% (22976) | -0.012 | 32.09% (11716) | 31.96% (11681) | 0.003  |
| Atrial fibrillation/Flutter           | 5.96% (2175)   | 5.45% (3839)   | 0.022  | 5.96% (2175)   | 5.9% (2156)    | 0.002  |
| Coronary artery bypass graft surgery  | 3.65% (1331)   | 2.07% (1458)   | 0.095  | 3.65% (1331)   | 3.69% (1347)   | -0.002 |
| Percutaneous coronary intervention    | 7.11% (2596)   | 3.79% (2665)   | 0.147  | 7.11% (2596)   | 7.3% (2668)    | -0.008 |
| Pacemaker                             | 9.24% (3372)   | 8.46% (5956)   | 0.027  | 9.24% (3372)   | 9.65% (3528)   | -0.015 |
| Congestive heart failure              | 13.78% (5033)  | 12.52% (8814)  | 0.037  | 13.78% (5033)  | 13.84% (5058)  | -0.002 |
| Chronic liver disease                 | 4.84% (1768)   | 4.83% (3401)   | 0.000  | 4.84% (1768)   | 4.79% (1749)   | 0.003  |
| Urinary tract infections              | 3.02% (1101)   | 4.98% (3507)   | -0.101 | 3.02% (1101)   | 3.05% (1116)   | -0.002 |
| Asthma                                | 14.84% (5418)  | 14.25% (10034) | 0.017  | 14.84% (5418)  | 14.8% (5407)   | 0.001  |
| Chronic obstructive pulmonary disease | 21.94% (8010)  | 20.88% (14700) | 0.026  | 21.94% (8010)  | 22.01% (8044)  | -0.002 |
| Obesity                               | 9.01% (3291)   | 6.19% (4358)   | 0.107  | 9.01% (3291)   | 9.26% (3383)   | -0.009 |
| Hypertension                          | 76.49% (27928) | 71.07% (50028) | 0.123  | 76.49% (27928) | 75.9% (27738)  | 0.013  |
| Stroke                                | 2.48% (906)    | 3.19% (2243)   | -0.043 | 2.48% (906)    | 2.5% (914)     | -0.001 |
| Diabetes Complications                |                |                |        |                |                |        |
| Diabetic retinopathy                  | 0.8% (291)     | 0.7% (492)     | 0.011  | 0.8% (291)     | 0.78% (284)    | 0.002  |
| Diabetic neuropathy                   | 1.25% (456)    | 1.25% (882)    | 0.000  | 1.25% (456)    | 1.21% (443)    | 0.003  |
| Peripheral vascular disease           | 1.41% (514)    | 1.33% (937)    | 0.007  | 1.41% (514)    | 1.37% (501)    | 0.003  |
| Hypoglycemia                          | 0.66% (242)    | 0.85% (596)    | -0.021 | 0.66% (242)    | 0.7% (256)     | -0.004 |

|                              |                |                |        |                |                |        |
|------------------------------|----------------|----------------|--------|----------------|----------------|--------|
| Hyperglycemic emergency      | 0.23% (84)     | 0.28% (198)    | -0.010 | 0.23% (84)     | 0.23% (86)     | -0.001 |
| Medications                  |                |                |        |                |                |        |
| ACE inhibitors               | 29.83% (10891) | 27.71% (19505) | 0.047  | 29.83% (10891) | 29.55% (10799) | 0.006  |
| ARBs                         | 22.61% (8254)  | 20.55% (14464) | 0.050  | 22.61% (8254)  | 22.57% (8247)  | 0.001  |
| Aspirin                      | 0.77% (282)    | 1.15% (812)    | -0.039 | 0.77% (282)    | 0.78% (285)    | -0.001 |
| Beta blockers                | 36.68% (13392) | 30.97% (21802) | 0.121  | 36.68% (13392) | 35.93% (13130) | 0.016  |
| Calcium channel blockers     | 31.9% (11647)  | 31.73% (22338) | 0.004  | 31.9% (11647)  | 31.48% (11505) | 0.009  |
| H2RAs                        | 2.86% (1044)   | 3.3% (2324)    | -0.026 | 2.86% (1044)   | 2.81% (1027)   | 0.003  |
| NSAIDs (excluding aspirin)   | 8.98% (3278)   | 8.65% (6086)   | 0.012  | 8.98% (3278)   | 9.24% (3377)   | -0.009 |
| Statin                       | 70.1% (25597)  | 64% (45048)    | 0.130  | 70.1% (25597)  | 69.59% (25432) | 0.011  |
| Proton pump inhibitors       | 20.67% (7549)  | 20.15% (14186) | 0.013  | 20.67% (7549)  | 20.7% (7565)   | -0.001 |
| Loop diuretic                | 10.26% (3748)  | 10.39% (7315)  | -0.004 | 10.26% (3748)  | 10.06% (3676)  | 0.007  |
| Potassium sparing diuretics  | 4.87% (1778)   | 3.85% (2707)   | 0.050  | 4.87% (1778)   | 4.65% (1699)   | 0.011  |
| Thiazide diuretics           | 16% (5841)     | 14.93% (10511) | 0.029  | 16% (5841)     | 15.95% (5828)  | 0.001  |
| Glucose-Lowering Medications |                |                |        |                |                |        |
| Insulin                      | 22.65% (8270)  | 12.19% (8581)  | 0.278  | 22.65% (8270)  | 22.68% (8288)  | -0.001 |
| Acarbose                     | 0.48% (175)    | 0.41% (289)    | 0.010  | 0.48% (175)    | 0.49% (177)    | -0.001 |
| Metformin                    | 68.58% (25041) | 65.67% (46224) | 0.062  | 68.58% (25041) | 68.19% (24921) | 0.008  |
| Repaglinide                  | 0.03% (10)     | 0.05% (33)     | -0.010 | 0.03% (10)     | 0.03% (9)      | 0.001  |
| Rosiglitazone                | 0.02% (8)      | 0.05% (33)     | -0.013 | 0.02% (8)      | 0.02% (7)      | 0.001  |
| Semaglutide                  | 0.29% (106)    | 0.02% (15)     | 0.068  | 0.29% (106)    | 0.32% (116)    | -0.007 |
| Pioglitazone                 | 0.29% (106)    | 0.37% (257)    | -0.013 | 0.29% (106)    | 0.33% (120)    | -0.006 |
| Gliclazide                   | 18.93% (6913)  | 18.25% (12845) | 0.018  | 18.93% (6913)  | 19.41% (7094)  | -0.012 |
| Glyburide                    | 2.47% (901)    | 3.55% (2500)   | -0.063 | 2.47% (901)    | 2.71% (990)    | -0.014 |

Proportions in % (counts) and mean (standard deviation) were reported for categorical and continuous variables, respectively. ACE = Angiotensin-converting enzyme; ARBs = Angiotensin II Receptor Blockers; H2RAs = Histamine-2 Receptor Antagonists; Non-steroidal anti-inflammatory drugs = NSAIDs; SMD = standardized mean difference.

**Supplementary Table 3. Covariate Definition.**

| Variable                                                        | Code Set                                                                                                 | Datasets Used | Details                                                                                                                                                                                                                                    |
|-----------------------------------------------------------------|----------------------------------------------------------------------------------------------------------|---------------|--------------------------------------------------------------------------------------------------------------------------------------------------------------------------------------------------------------------------------------------|
| <b>Demographics</b>                                             |                                                                                                          |               |                                                                                                                                                                                                                                            |
| Age                                                             | Categorized into 66-69, 70-74, 75-79, 80-84, 85-89, 90+                                                  | RPDB          | Age was treated as a categorical variable when propensity score was calculated.                                                                                                                                                            |
| Sex - Male                                                      | Males, Females                                                                                           | RPDB          | --                                                                                                                                                                                                                                         |
| Rural                                                           | Yes/No                                                                                                   | RPDB          | Rural area is defined as population $\leq 10,000$ . People with missing rural indicator were excluded.                                                                                                                                     |
| Duration of diabetes                                            | Derived from age of diabetes diagnosis                                                                   | ODD           | People with missing data were excluded.                                                                                                                                                                                                    |
| Neighbourhood Income Quintile                                   | Coded as quintiles (1, 2, 3, 4, 5)                                                                       | RPDB          | Income quintiles used average neighbourhood income on index date as defined by Statistics Canada.<br>1 is lowest quintile (poorest) and 5 is highest quintile (richest). People with missing neighbourhood income quintiles were excluded. |
| Neighbourhood Post-Secondary Quintile                           | Coded as quintiles (1, 2, 3, 4, 5)                                                                       | RPDB          | Post-Secondary quintiles used average neighbourhood post-secondary completion rate on index date.<br>1 stands for the lowest and 5 stands for the highest. People with missing neighbourhood post-secondary quintiles were excluded.       |
| <b>Prescriber Information</b>                                   |                                                                                                          |               |                                                                                                                                                                                                                                            |
| Prescribing Physician                                           | Coded as General Practitioner, Cardiologist, Endocrinologist, Internist, Nephrologist, Other, or Missing | ODB, IPDB     | --                                                                                                                                                                                                                                         |
| <b>Comorbidities (5-year look-back window unless specified)</b> |                                                                                                          |               |                                                                                                                                                                                                                                            |
| Chronic kidney disease                                          | Yes/No                                                                                                   | DAD, OHIP     | ICD-10: E102, E112, E132, E142, I12, I13, N00, N01, N02, N03, N04, N05, N06, N07, N08, N10, N11, N12, N13, N14, N15, N16, N17, N18, N19, N20, N21, N22, N23<br>OHIP diagnosis codes: 403, 585                                              |
| Previous acute kidney injury                                    | Yes/No                                                                                                   | DAD           | ICD-10: N17                                                                                                                                                                                                                                |
| Acute urinary retention (AUR)                                   | Yes/No                                                                                                   | DAD           | ICD-10: R33                                                                                                                                                                                                                                |

|                                      |        |                  |                                                                                                                                                                                                                                                                                                                                                                                                                                                                                                                                                                                                                                                                                                                                                                                                                                                                                               |
|--------------------------------------|--------|------------------|-----------------------------------------------------------------------------------------------------------------------------------------------------------------------------------------------------------------------------------------------------------------------------------------------------------------------------------------------------------------------------------------------------------------------------------------------------------------------------------------------------------------------------------------------------------------------------------------------------------------------------------------------------------------------------------------------------------------------------------------------------------------------------------------------------------------------------------------------------------------------------------------------|
| Chronic lung disease                 | Yes/No | OHIP, DAD, NACRS | ICD-10: I272, I278, I279, J40, J41, J42, J43, J44, J45, J47, J60, J61, J62, J63, J64, J65, J66, J67, J68, J701, J703, J704, J708, J709, J82, J84, J92, J941, J949, J953, J961, J969, J984, J988, J989, J99<br>OHIP dx: 491, 492, 493, 494, 496, 501, 502, 515, 518, 519<br>OHIP fee codes: J889, J689                                                                                                                                                                                                                                                                                                                                                                                                                                                                                                                                                                                         |
| Cancer                               | Yes/No | DAD, OHIP        | ICD-10: C00, C01, C02, C03, C04, C05, C06, C07, C08, C09, C10, C11, C12, C13, C14, C15, C16, C17, C18, C19, C20, C21, C22, C23, C24, C25, C26, C30, C31, C32, C33, C34, C37, C38, C39, C40, C41, C43, C44, C45, C46, C47, C48, C49, C50, C51, C52, C53, C54, C55, C56, C57, C58, C60, C61, C62, C63, C64, C65, C66, C67, C68, C69, C70, C71, C72, C73, C74, C75, C76, C77, C78, C79, C80, C81, C82, C83, C84, C85, C86, C88, C90, C91, C92, C93, C94, C95, C96, C97, D00, D01, D02, D03, D04, D05, D06, D07, D09, Z85<br>OHIP diagnostic codes: 140, 141, 142, 143, 144, 145, 146, 147, 148, 149, 150, 151, 152, 153, 154, 155, 156, 157, 158, 159, 160, 161, 162, 163, 164, 165, 170, 171, 172, 173, 174, 175, 179, 180, 181, 182, 183, 184, 185, 186, 187, 188, 189, 190, 191, 192, 193, 194, 195, 196, 197, 198, 199, 200, 201, 202, 203, 204, 205, 206, 207, 208, 230, 231, 232, 233, 234 |
| Stroke                               | Yes/No | DAD, NACRS       | ICD-10: I60, I61, I63 (excluding I63.6), I64, H341, H340<br>Note: Transient ischemic attack was not included                                                                                                                                                                                                                                                                                                                                                                                                                                                                                                                                                                                                                                                                                                                                                                                  |
| Atrial Fibrillation/Flutter          | Yes/No | DAD              | ICD-10: I48                                                                                                                                                                                                                                                                                                                                                                                                                                                                                                                                                                                                                                                                                                                                                                                                                                                                                   |
| Coronary artery bypass graft surgery | Yes/No | DAD, OHIP        | CCI (Canadian Classification of Health Interventions): 1IJ76<br>OHIP fee codes: R742, R743, E654, E645, E652, E646                                                                                                                                                                                                                                                                                                                                                                                                                                                                                                                                                                                                                                                                                                                                                                            |
| Percutaneous coronary intervention   | Yes/No | DAD              | CCI: 1IJ50, 1IJ57GQ, 1IJ54GQAZ<br>OHIP fee codes: Z434, G262, G298                                                                                                                                                                                                                                                                                                                                                                                                                                                                                                                                                                                                                                                                                                                                                                                                                            |

|                                       |        |                  |                                                                                                                                                                                                                                                                                 |
|---------------------------------------|--------|------------------|---------------------------------------------------------------------------------------------------------------------------------------------------------------------------------------------------------------------------------------------------------------------------------|
| Pacemaker                             | Yes/No | NACRS, DAD, OHIP | CCI: 1HZ37, 1HD53GRJA, 1HD54GRJA, 1HZ53GRNK, 1HZ53GRNL, 1HZ53GRNM, 1HZ54LANJ, 2HZ07NK, 2HZ07NL, 2HZ07NM, 1HZ53GRFR, 1HZ53LAFR, 1HZ53SYFR, 1HD55, 1HZ09, 1HZ55, 2HZ24, 1Hz53GRNN<br>OHIP fee codes: G303, Z433, Z435, Z443, Z444, Z445, R752, Z412, Z428, E628, G176, G177, G115 |
| Congestive heart failure              | Yes/No | DAD, OHIP        | ICD-10: I500, I501, I509<br>OHIP diagnosis code: 428                                                                                                                                                                                                                            |
| Chronic Liver Disease                 | Yes/No | DAD, OHIP        | ICD-10: B16, B17, B18, B19, I85, R17, R18, R160, R162, B942, Z225, E831, E830, K70, K713, K714, K715, K717, K721, K729, K73, K74, K753, K754, K758, K759, K76, K77<br>OHIP diagnosis codes: 571, 573, 070<br>OHIP fee codes: Z551, Z554                                         |
| Hypertension                          | Yes/No | ODB              | Any claim in the last 120 day for any hypertension medications: ACE inhibitors, ARBs, beta-blockers, calcium channel blockers, and thiazide diuretics                                                                                                                           |
| Previous urinary tract infections     | Yes/No | DAD              | ICD-10: N10, N11, N12, n136, N151, N159, N160, N300, N308, N309, N340, N390, N410, N411, N412, N413, N431, N45, T835                                                                                                                                                            |
| Chronic obstructive pulmonary disease | Yes/No | DAD, OHIP        | ICD-10: J41, J42, J43, J44<br>OHIP diagnostic codes: 491, 492, 496                                                                                                                                                                                                              |
| Asthma                                | Yes/No | DAD, OHIP        | ICD-10: J45, J46<br>OHIP diagnostic code: 493                                                                                                                                                                                                                                   |
| Obesity                               | Yes/No | NACRS, DAD, OHIP | ICD-10: E66.0, E66.1, E66.2, E66.8, E66.9<br>OHIP diagnostic code: 278                                                                                                                                                                                                          |
| Diabetic retinopathy                  | Yes/No | DAD              | ICD-10: E1030, E1031, E1032, E1033, E1130, E1131, E1132, E1133, E1330, E1331, E1332, E1333, E1430, E1431, E1432, E1433, H360                                                                                                                                                    |
| Diabetic neuropathy                   | Yes/No | DAD              | ICD-10: E1040, E1041, E1042, E1048, E1049, E1440, E1441, E1442, E1448, E1140, E1141, E1142, E1148, E1340, E1341, E1342, E1348, E1349, G590, G632, G990                                                                                                                          |
| Peripheral Vascular Disease           | Yes/No | DAD, OHIP        | ICD-10: I700, I702, I708, I709, I731, I738, I739, K551                                                                                                                                                                                                                          |



|                                                            |                                                        |     |                                                                                                                                                                                                                                                                                                                                                           |
|------------------------------------------------------------|--------------------------------------------------------|-----|-----------------------------------------------------------------------------------------------------------------------------------------------------------------------------------------------------------------------------------------------------------------------------------------------------------------------------------------------------------|
|                                                            |                                                        |     | CCP: 5125, 5129, 5014, 5016, 5018, 5028, 5038, 5126, 5159<br>CCI: 1KA76, 1KA50, 1KE76, 1KG50, 1KG57, 1KG76MI, 1KG87, 1IA87LA, 1IB87LA, 1IC87LA, 1ID87, 1KA87LA, 1KE57<br>OHIP fee codes: R787, R780, R797, R804, R809, R875, R815, R936, R783, R784, R785, E626, R814, R786, R937, R860, R861, R855, R856, R933, R934, R791, E672, R794, R813, R867, E649 |
| Hypoglycemia                                               | Yes/No                                                 | DAD | ICD-10: E15, E160, E161, E162, E1063, E1163, E1363, E1463                                                                                                                                                                                                                                                                                                 |
| Hyperglycemic emergency                                    | Yes/No                                                 | DAD | ICD-10: E1410, E1412, E1010, E1012, E1110, E1112, E1300, E140                                                                                                                                                                                                                                                                                             |
| Charlson comorbidity index                                 | Categorized as 0 (or no hospitalization), 1, 2, and 3+ | DAD | Identify all acute DAD records in <b>2 years prior</b> and then weight the records for index calculation                                                                                                                                                                                                                                                  |
| <b>Prescribed Medication Use (120-day lookback window)</b> |                                                        |     |                                                                                                                                                                                                                                                                                                                                                           |
| Polypharmacy                                               | Categorized as 0, 1-5, 6-10, and 10+                   | ODB | Identify the number of unique DINs (Drug Identification Numbers) in the past 120 days                                                                                                                                                                                                                                                                     |
| Other Glucose-Lowering Medications                         | Yes/No                                                 | ODB | Insulin, metformin, acarbose, repaglinide, rosiglitazone, pioglitazone, semaglutide, gliclazide, glyburide                                                                                                                                                                                                                                                |
| Medications for other indication                           | Yes/No                                                 | ODB | ACE inhibitors, ARBs, aspirin, beta-blockers, calcium channel blockers, H2RAs, NSAIDs (excluding aspirin), statin, proton pump inhibitors, loop diuretics, thiazide diuretics, potassium-sparing diuretics                                                                                                                                                |

**Supplementary Table 4. Breakdowns of baseline exposures.**

|                         | <b>Before Weighting</b> |                   | <b>After Weighting</b> |                   |
|-------------------------|-------------------------|-------------------|------------------------|-------------------|
|                         | <b>N</b>                | <b>Proportion</b> | <b>N</b>               | <b>Proportion</b> |
| <b>SGLT2 Inhibitors</b> |                         |                   |                        |                   |
| Canagliflozin           | 6293                    | 17.23%            | 6293                   | 17.23%            |
| Dapagliflozin           | 5757                    | 15.77%            | 5757                   | 15.77%            |
| Empagliflozin           | 24463                   | 67.00%            | 24463                  | 67.00%            |
| <b>DPP4 Inhibitors</b>  |                         |                   |                        |                   |
| Linagliptin             | 17569                   | 24.96%            | 8714                   | 23.84%            |
| Saxagliptin             | 1792                    | 2.55%             | 798                    | 2.18%             |
| Sitagliptin             | 51029                   | 72.49%            | 27032                  | 73.97%            |

**Supplementary Table 5. Summary of Study End Points.**

|                                                            | <b>Before Weighting</b>               |                                      | <b>After Weighting</b>                |                                      |
|------------------------------------------------------------|---------------------------------------|--------------------------------------|---------------------------------------|--------------------------------------|
|                                                            | <b>SGLT2 Inhibitors<br/>(n=36513)</b> | <b>DPP4 Inhibitors<br/>(n=70390)</b> | <b>SGLT2 Inhibitors<br/>(n=36513)</b> | <b>DPP4 Inhibitors<br/>(n=36545)</b> |
| <b>Intention-To-Treat Analysis</b>                         |                                       |                                      |                                       |                                      |
| Censoring due to death                                     | 1459 (4.0%)                           | 5294 (7.5%)                          | 1459 (4.0%)                           | 2006 (5.5%)                          |
| Censoring due to end of eligibility or end of study period | 34494 (94.5%)                         | 62925 (89.4%)                        | 34494 (94.5%)                         | 33843 (92.6%)                        |
| Event                                                      | 560 (1.5%)                            | 2171 (3.1%)                          | 560 (1.5%)                            | 696 (1.90%)                          |
| <b>As-Treated Analysis</b>                                 |                                       |                                      |                                       |                                      |
| Censoring due to death                                     | 917 (2.5%)                            | 3132 (4.5%)                          | 917 (2.5%)                            | 1193 (3.3%)                          |
| Censoring due to end of eligibility or end of study period | 22953 (62.8%)                         | 26505 (37.7%)                        | 22953 (62.8%)                         | 15819 (43.3%)                        |
| Censoring at 1 year after crossover                        | 6288 (17.2%)                          | 9880 (14.0%)                         | 6288 (17.2%)                          | 5642 (15.4%)                         |
| Censoring at 1 year after discontinuation                  | 5992 (16.4%)                          | 29540 (42.0%)                        | 5992 (16.4%)                          | 13465 (36.9%)                        |
| Event                                                      | 363 (0.99%)                           | 1333 (1.9%)                          | 363 (0.99%)                           | 426 (1.2%)                           |
